# Supplementary material
Source: PubMed Central journal article supplement (PMC5737119)
Supplement: ba007294-suppl1.pdf [file ba007294-suppl1.pdf]

## **APPENDIX**

### **Survey text**

Below is the text describing the blood and bone marrow tests for MRD in the survey instrument.

The text preceded the questions about MRD testing presented in Figure 5.

#### **Blood Test:**

Treatments for CLL can work differently for different people. A treatment that works well for one person may not work as well for another. Your doctor can use standard methods, such as physical examinations, CT scans, or standard blood tests, to see how well you responded to your CLL treatment.

When there are a small number of cancer cells left in the blood or bone marrow, standard tests may not find them.

Currently, there are new tests that have been shown to be at least 100 times more sensitive than the standard test your doctor uses. Using either your blood or bone marrow, these tests can find one single CLL cell among 10,000 normal cells.

These new tests will give your doctor better information on the chance that you will have a long remission (a long time before the cancer comes back). Your doctor could use this information to decide how much monitoring you need and your future treatment strategies.

#### **Bone Marrow Test:**

CLL cells can be in your blood and your bone marrow. It is also important for doctors to know how many cancer cells are in your bone marrow. To do the test from bone marrow samples, you will need to have a bone marrow aspiration to remove some of your bone marrow.

During a bone marrow aspiration, doctors will

- numb the skin around your hip,

- insert a hollow needle into your hip bone, and
- remove a small piece of the hip bone and some of the marrow inside the bone.

This process can cause brief but intense pain, even though the skin is numb. Many physicians are interested in their patient's bone marrow status because bone marrow disease is a major concern in patients with CLL.

### **Results for Ordered Logit Analysis of MRD Testing Questions**

Table 3 and Table 4 present the results of the ordered logistic regressions for interest in the blood and bone marrow tests, respectively.

**Table 1. Ordered logistic regression for interest in additional blood test (n = 318)**

| <b>Variable</b>       | <b>Estimated parameter</b> | <b>Standard error</b> | <b>P</b> |
|-----------------------|----------------------------|-----------------------|----------|
| Age                   | -0.036*                    | 0.016                 | 0.027    |
| Female                | -0.587*                    | 0.246                 | 0.017    |
| College degree        | -0.252                     | 0.275                 | 0.358    |
| Income                | 0.146                      | 0.089                 | 0.098    |
| Urban                 | 0.315                      | 0.781                 | 0.687    |
| Suburban              | 0.502                      | 0.761                 | 0.509    |
| Rural                 | 1.335                      | 0.797                 | 0.094    |
| Employed full-time    | -0.166                     | 0.347                 | 0.632    |
| Employed part-time    | 0.338                      | 0.452                 | 0.455    |
| Single                | 1.920                      | 1.528                 | 0.209    |
| Married               | 0.788                      | 1.430                 | 0.581    |
| Widowed               | 0.883                      | 1.455                 | 0.544    |
| Divorced              | 1.073                      | 1.435                 | 0.455    |
| Black                 | 0.625                      | 1.094                 | 0.568    |
| White                 | 0.264                      | 0.936                 | 0.778    |
| Private insurance     | 0.400                      | 0.304                 | 0.188    |
| Public insurance      | 0.883*                     | 0.368                 | 0.016    |
| First line            | -0.002                     | 0.301                 | 0.994    |
| Relapse               | 0.211                      | 0.283                 | 0.456    |
| Years since diagnosis | -0.027                     | 0.017                 | 0.107    |
| Cut1                  | -3.686                     | 1.925                 |          |

---

|      |        |       |
|------|--------|-------|
| Cut2 | -2.499 | 1.913 |
| Cut3 | -1.356 | 1.912 |
| Cut4 | -0.305 | 1.909 |

---

\* $P < 0.05$ .

**Table 2. Ordered logistic regression for interest in additional bone marrow aspiration test (n = 318)**

| Variable                       | Estimated |                |          |
|--------------------------------|-----------|----------------|----------|
|                                | parameter | Standard error | <i>P</i> |
| Age                            | -0.020    | 0.015          | 0.181    |
| Female                         | -0.606**  | 0.221          | 0.006    |
| College degree                 | -0.421    | 0.248          | 0.090    |
| Income                         | 0.108     | 0.079          | 0.171    |
| Urban                          | 1.042     | 0.750          | 0.164    |
| Suburban                       | 0.702     | 0.732          | 0.338    |
| Rural                          | 1.578*    | 0.750          | 0.035    |
| Employed full-time             | -0.162    | 0.321          | 0.613    |
| Employed part-time             | 0.957*    | 0.414          | 0.021    |
| Single                         | 2.206     | 1.299          | 0.089    |
| Married                        | 1.619     | 1.232          | 0.189    |
| Widowed                        | 1.547     | 1.273          | 0.224    |
| Divorced                       | 1.437     | 1.233          | 0.244    |
| Had bone marrow<br>test before | 1.299**   | 0.249          | 0.000    |
| Black                          | 1.964*    | 0.997          | 0.049    |
| White                          | 0.764     | 0.790          | 0.334    |
| Private insurance              | -0.092    | 0.270          | 0.734    |
| Public insurance               | 0.515     | 0.330          | 0.119    |
| First line                     | -0.124    | 0.284          | 0.663    |

|                          |        |       |       |
|--------------------------|--------|-------|-------|
| Relapse                  | -0.341 | 0.257 | 0.184 |
| Years since<br>diagnosis | -0.024 | 0.017 | 0.165 |
| Cut1                     | 0.053  | 1.670 |       |
| Cut2                     | 1.385  | 1.671 |       |
| Cut3                     | 2.313  | 1.673 |       |
| Cut4                     | 3.376  | 1.677 |       |

\* $P < 0.05$ ; \*\* $P < 0.01$ .
